# Supplementary material for: Level0-to-Level1B processor for MethaneAIR
Source: Copernicus journal article supplement (doi:10.5194/amt-2023-111), 2023-06-23
Supplement: Supplementary file [file amt-2023-111-AC2-supplement.pdf]

## Response to Reviewer #2.

We would like to thank the reviewer for taking the time to review our article, and for providing critical feedback on the manuscript. Below, we cycle through each of the comments in order of their appearance and provide a response. All edits have been implemented in the revised manuscript, where necessary.

### Affiliation

1. Page 1: Change from “Center for Astrophysics | Harvard and Smithsonian” to “Harvard - Smithsonian Center for Astrophysics,” and remove “.02138”.
  - a. **Some years ago (1-3) the CfA changed its name from “Harvard - Smithsonian Center for Astrophysics,” to “Center for Astrophysics | Harvard and Smithsonian”. 02138 will be removed.**

### Abstract

1. Page 1, line 1: Spell out “L0” and “L1B”.
  - a. **We have spelled out ‘L0’ and ‘L1B’.**
2. Page 1, line 4: Spell out “EDF”.
  - a. **We have expanded ‘EDF’.**
3. Page 1, line 5: The accuracy is defined as concentration in unit of ppb. In the nominal case, emissions are expressed as flux. Then, the readers have incongruous with emission accuracy in unit of ppb. Recommend the rewording.
  - a. **We apologize for the incorrect usage of ‘emissions’ in this context. We have removed ‘emissions’ from the sentence.**
4. Page 1, line 8: Spell out “ISRF”.
  - a. **We have expanded ISRF.**

### Introduction

1. Page 2, line 35: Same comment as comment #4.
  - a. **We apologize for the incorrect usage of ‘emissions’ in this context. We have removed ‘emissions’ from the sentence.**
2. Page 2, line 45: Correct “Greenhouse Gas ...” to “Greenhouse Gases ...”.
  - a. **We have changed ‘gas’ to ‘gases’.**

### The MethaneAIR Instrument

1. Page 4, Figure 1: The flight route for RF10 is not presented in Fig.1. However, in table 1, the flight duration is presented as 4.7 hrs. It is unclear that RF10 is actual flight or on-ground activity. If RF10 is still on flight activity, the flight route has to be indicated in Fig.1.
  - a. **We have added RF10. We omitted it as it was not measuring CH4 emissions, but rather for recording airglow.**

### L0-L1B Development

1. Page 5, line 4: The processing time is 180 times longer than that of actual observation duration. Then, it seems that the selected scene data is only processed with this proposed processing chain. In this case, the authors also have to touch on the scene selection process before Level 0 to Level 1B processing as well as some limitation such as duration for one selected scene.

- a. **The data for an entire flight is always processed in this chain. We should have clarified that each L0 granule that is collected covers 30-seconds of observation.**
2. *Page 5, line 159: How to determine the “electronic offset” value?*
  - a. **The electronic offset was determined during instrument calibration [Staebell et al.]. It is the dark current at zero integration time. It is ‘1500’ DN. This has been added to the document.**
3. *Page 5, Figure 2: How to handle the aircraft window transmission in the processing chain? The processing box is presented in Fig.2. However, it is no explanation in the text. The authors have to touch on this topic.*
  - a. **We have added a few sentences that discusses the window transmission in section 3.5 – ‘Wavelength and ILS Calibration’.**
4. *Page 7, Eq.2: What is the meaning of  $\lambda'$ ,  $\delta\lambda$ ,  $A!$  and  $B''$  ?*
  - a. **The integration variable ( $\lambda'$ ) spans the wavelength range of the ILS convolution.  $\delta\lambda$  represents the wavelength shift.  $A!_{\{k\}}$  represents variables that are optimized in the LSQ fit, and scale the absorption factors (A, B, C).  $B_{\{j\}}$  are also numerical values that are optimized and shift the observation. These explanations have been added.**
5. *Page 9, Figure 3: What is the required output spectral range for MethaneAIR CH4 retrieval? In the text at line 39, the spectral range from 1598 nm and 1683 nm is defined for observation. However, the plot for CH4 is started around 1602 nm and ended around 1655 nm. The authors have to be clearly described the output spectral range for MethanAIR L1B file both CH4 and CO2 bands.*
  - a. **The retrieval window range will not be the same as the window range considered here. This window is to derive the wavelength shift that is occurring, not to retrieve CH4. The QE of the instrument decreases towards the ends of the spectra and can increase the noise in the fit, hence the ends were omitted. We have added an explanation to the text.**
6. *Page 11, Figure 4: It is hard to distinguish between “Gaussian Filtered ISRF” and “LUT ISRF”, due to the same color. Update to clearer plot with changing the color or the size of symbol.*
  - a. **The colors are meant to be the same between the two different models, but the shape of the points are ‘stars’ and ‘dots’ – we have made the data points larger to enhance the distinction.**
7. *Page 12 line 285: The onboard avionics are mounted on the aircraft and these data are used for aircraft operation. The mounting geometry between the aircraft and instrument platform is not taken account in the first guess. Then, the systematic error source for line of sight (LOS) is the 3D-rotation of instrumental platform against the aircraft base. Is this understanding correct? Usually, including the satellite sensors, the position and rotation angle of optical bench during observation is monitored and applied for LOS processing. Why the additional IRU unit is not mounted on the optical bench? It seems that the processing cost for first guess will be reduced by applying onboard IRU data.*
  - a. **This analysis is correct, there is a 3-D rotation between the instrument platform and the aircraft base, which is where we receive the initial parameters of the instrument orientation and position in 3-D space. We have not performed an analysis of the numerical transformation variables that the orthorectification is calculating for all observation data files, but this constant 3-D rotation should be common to all flight observations. We have added a line to the document (conclusion) that suggests we will take this into account in future editions of the L0-L1B processing chain to increase the efficiency.**

8. *Page 13, line 313: Spell out "IERS".*
  - a. **IERS has been spelled out.**
9. *Page 13, line 319 and 321: Typo "MethanAir"*
  - a. **Typo corrected.**
10. *Page 17, line 407: The across-track offset is estimated as 150 to 200 pixels (rows). O2 and CH4 camera have 1280 pixels in rows. In this case, co-aligned pixels are almost 1000 pixels in rows. In the text, L1B files which indicated in Fig.2 is not described and it is unclear that all the output information of this processing chain. The authors have to describe the output (L1B file) of this processing chain. It seems that the effective across-track information is around 1000 location instead of 1280.*
  - a. **We have added a line to the document that explains that the effective number of pixels in the across-track dimension is in fact not the full 1,280 that the sensor possesses, but rather, it is approximately 950 due to how light falls onto the sensor.**

#### References

1. *Page 22, line 554, Staebell et al., now published in Atmospheric Measurement Techniques. The authors have to be updated the reference*
  - a. **We have adjusted this reference.**
